# Supplementary figures and images for: Fabrication of montmorillonite and titanate nanotube based coatings via layer-by-layer self-assembly method to enhance the thermal stability, flame retardancy and ultraviolet protection of polyethylene terephthalate (PET) fabric
Source: Royal Society of Chemistry journal article supplement (doi:10.1039/c6ra05213d), 2016-01-01

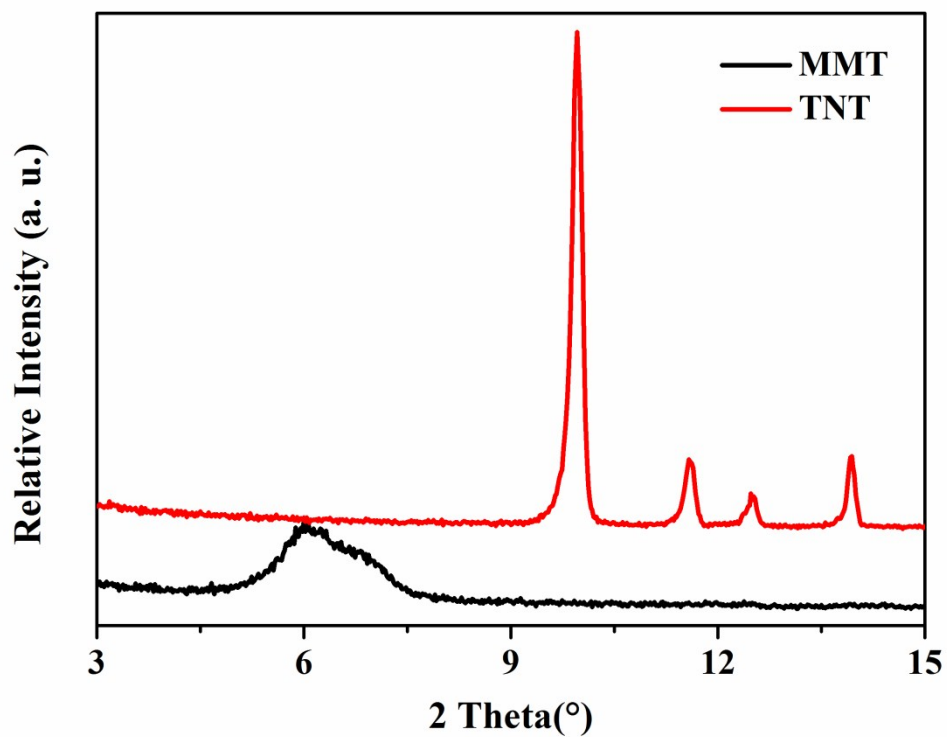

**Figure S1.** XRD patterns of MMT and TNT.

Supplement: c6ra05213d1.pdf [file c6ra05213d1.pdf]
